# Supplementary material
Source: Springer Nature journal article supplement (https://www.springermedizin.de/resource/supplementary/13030_2012_126_MOESM1_ESM.pdf/9644830)

A

Cortisol

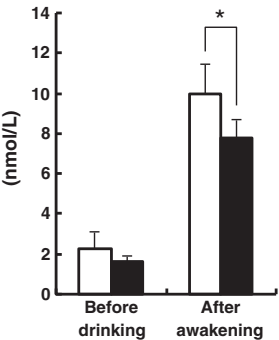

B

sIgA

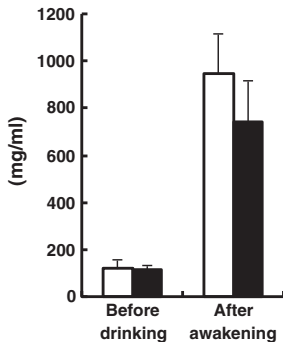

C

 $\alpha$ -Amylase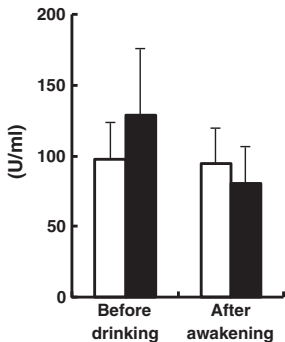

Supplement: MOESM1 [file 9644830]
